# Supplementary material for: P1 interneurons promote a persistent internal state that enhances inter-male aggression in Drosophila
Source: eLife journal article supplement (doi:10.7554/elife.11346), 2015-12-29

Figure 3—figure supplement 2

A

*P1<sup>a</sup>>CsChrimson* comparison to pre-stimulation baseline

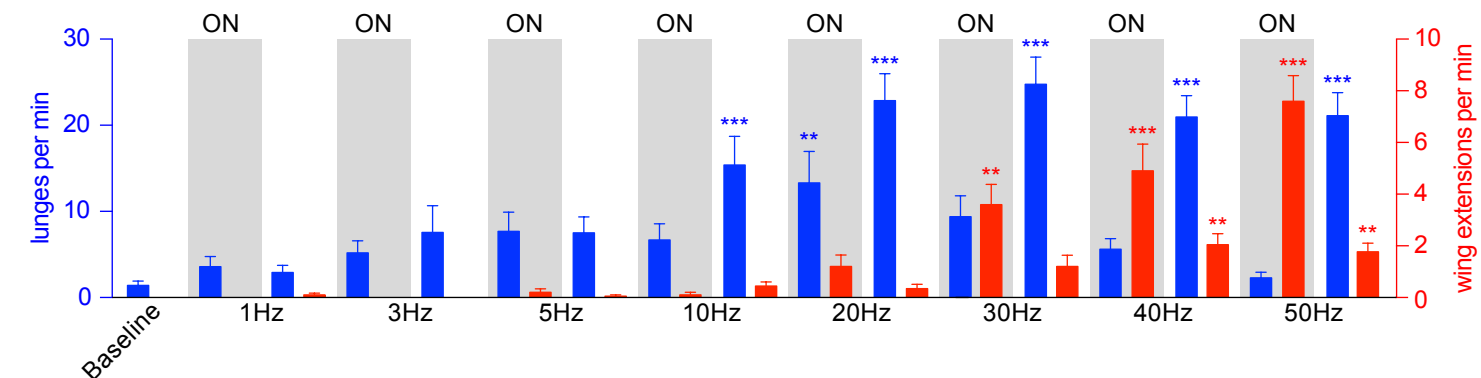

B

*P1<sup>a</sup>>CsChrimson* at 20Hz

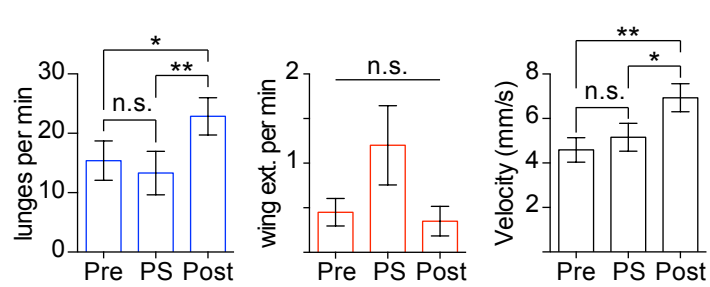

C

*P1<sup>a</sup>>CsChrimson* during light ON

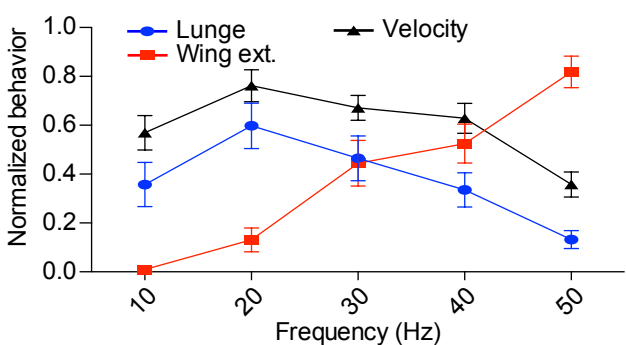

D

*BDPG4U>CsChrimson*

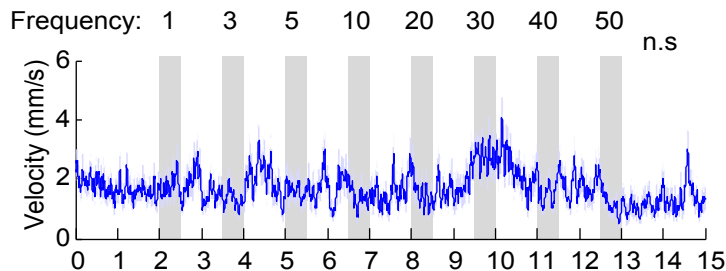

*P1<sup>a</sup>>CsChrimson*

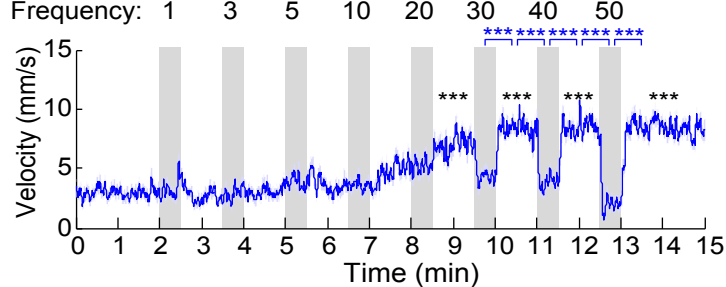

E

*P1<sup>a</sup>>CsChrimson* 50Hz stimulation

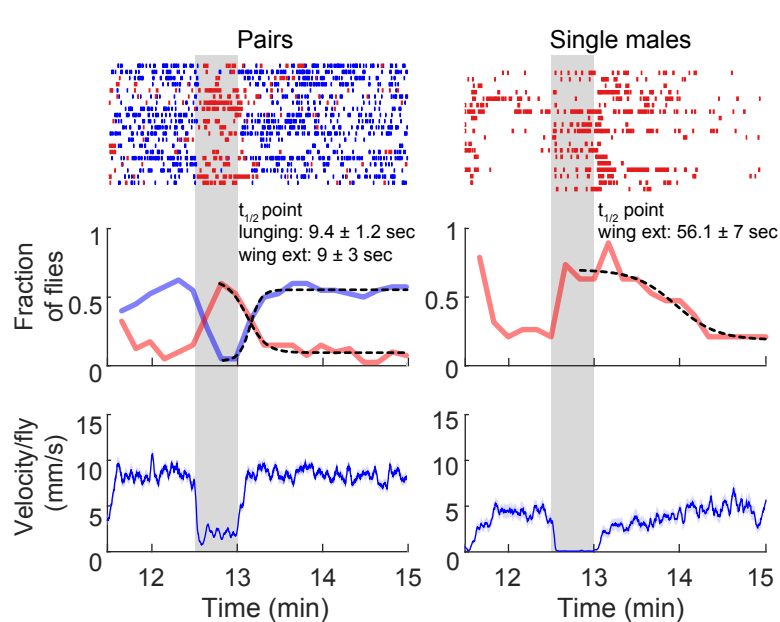

Supplement: supp [file elife-11346-supp-v1.zip]
