# Supplementary material for: P1 interneurons promote a persistent internal state that enhances inter-male aggression in Drosophila
Source: eLife journal article supplement (doi:10.7554/elife.11346), 2015-12-29
Supplement: supp [file elife_poa_e11346_Supplementary_File_2.xlsx]

## Sheet: List of genotypes
	Supplementary File 2 - List of full genotypes of flies used in each experiment
	Relevant figures	Abbreviated names	Complete genotypes
	Figure 1
	1C, 1-S1A-B		w1118;pJRFC12-10XUAS-IVS-myr::GFP (su(Hw)attP5)/+;R15A01-GAL4 (attP2)/+
			w1118;pJRFC12-10XUAS-IVS-myr::GFP (su(Hw)attP5)/+;R71G01-GAL4 (attP2)/+
	1D	BDPG4U>TrpA1	w+;UAS-dTrpA1/+;pBDPGAL4U (attP2)/+
		R15A01-GAL4>TrpA1	w+;UAS-dTrpA1/+;R15A01-GAL4 (attP2)/+
		R71G01-GAL4>TrpA1	w+;UAS-dTrpA1/+;R71G011-GAL4 (attP2)/+
	1E, 1-S1C	P1a split-GAL4 (P1a)	w1118;pJRFC12-10XUAS-IVS-myr::GFP (su(Hw)attP5)/R15A01-AD (attP40);R71G01-DBD (attP2)/+
	1F	R15A01-AD;BDP	w+;UAS-dTrpA1/R15A01-AD (attP40);pBPZpGAL4DBDU (attP2)/+
		R15A01-AD;nsyb	w+;UAS-dTrpA1/R15A01-AD (attP40);R57C10-DBD (attP2)/+
		R15A01-AD;R71G01-DBD	w+;UAS-dTrpA1/R15A01-AD (attP40);R71G01-DBD (attP2)/+
	1G, H	P1a>TrpA1	w+;UAS-dTrpA1/R15A01-AD (attP40);R71G01-DBD (attP2)/+
		BDPG4U>TrpA1	w+;UAS-dTrpA1/+;pBDPGAL4U (attP2)/+
		WT	Canton S
	Figure 2
	2B-G	BDPG4U ∩ FruFLP	w+;UAS>stop>myc::dTrpA1/+;pBDPGAL4U (attP2)/fruFLP
		R15A01-GAL4 ∩ FruFLP	w+;UAS>stop>myc::dTrpA1/+;R15A01-GAL4 (attP2)/fruFLP
		R71G01-GAL4 ∩ FruFLP	w+;UAS>stop>myc::dTrpA1/+;R71G01-GAL4 (attP2)/fruFLP
	Figure 3
	3A-G, 3-S2A-E	P1a>CsChrimson	w1118;R15A01-AD (attP40)/+;R71G01-DBD (attP2)/20XUAS-IVS-CsChrimson::venus (attP2)
		BDPG4U>CsChrimson	w1118;+/+;pBDPGAL4U (attP2)/20XUAS-IVS-CsChrimson::venus (attP2)
	3H, 3-S3		w1118,TK-GAL41;13XLexAop2-CsChrimson::venus (attP40)/+;5XUAS-eGFP::Kir2.1/+
			w1118,TK-GAL41;13XLexAop2-CsChrimson::venus (attP40)/+;R15A01-LexA(attP2)/+
			w1118;13XLexAop2-CsChrimson::venus (attP40)/+;5XUAS-eGFP::Kir2.1/R15A01-lexA (attP2)
			w1118,TK-GAL41;13XLexAop2-CsChrimson::venus (attP40)/+;5XUAS-eGFP::Kir2.1/R15A01-LexA (attP2)
	3I	P1a>ReaChR	w1118;pJRFC2-10XUAS-IVS-ReaChR::Citrine (attP40)/R15A01-AD (attP40);R71G01-DBD (attP2)/+
		oe+	w+;UAS-Stinger::GFP/PromE(800)-GAL4,tubP-GAL80ts
		oe-	w+;UAS-Stinger::GFP, UAS-Hid/PromE(800)-GAL4,tubP-GAL80ts
	Figure 4
	4A-F, 4-S1	P1a>ReaChR	w1118;pJRFC2-10XUAS-IVS-ReaChR::Citrine (attP40)/R15A01-AD (attP40);R71G01-DBD (attP2)/+
		BDPG4U>ReaChR	w1118;pJRFC2-10XUAS-IVS-ReaChR::Citrine (attP40)/+;pBDPGAL4U (attP2)/+
	Figure 5
	5B-H	P1a>ReaChR	w1118;pJRFC2-10XUAS-IVS-ReaChR::Citrine (attP40)/R15A01-AD (attP40);R71G01-DBD (attP2)/+
		BDPG4U>ReaChR	w1118;pJRFC2-10XUAS-IVS-ReaChR::Citrine (attP40)/+;pBDPGAL4U (attP2)/+
	Figure 1-figure supplement 1
	1-S1A-B		see Figure 1C
	1-S1C		see Figure 1E
	1-S1D		w1118;pJRFC12-10XUAS-IVS-myr::GFP (su(Hw)attP5)/+;pBDPGAL4U (attP2)/+
	Figure 1-figure supplement 2
	1-S2A-C	R22G11-GAL4	w1118;pJRFC12-10XUAS-IVS-myr::GFP in su(Hw)attP5/+;R22G11-GAL4 (attP2)/+
		R15A01-AD;R22G11-DBD	w1118;pJRFC12-10XUAS-IVS-myr::GFP in su(Hw)attP5/R15A01-AD in attP40;R22G11-DBD (attP2)/+
		R71G01-AD;R22G11-DBD	w1118;pJRFC12-10XUAS-IVS-myr::GFP in su(Hw)attP5/R71G01-AD in attP40;R22G11-DBD (attP2)/+
	1-S2D	BDPG4U	w+;UAS-dTrpA1/+;pBDPGAL4U (attP2)/+
		R22G11	w+;UAS-dTrpA1/+;R22G11-GAL4 (attP2)/+
	1-S2E	15A01-AD;BDP	w1118;R15A01-AD (attP40)/+;pBPZpGAL4DBDU (attP2)/pJRFC2-10XUAS-IVS-dTrpA1 (attP2)
		15A01AD;22G11-DBD	w1118;R15A01-AD (attP40)/+;R22G11-DBD (attP2)/pJRFC2-10XUAS-IVS-dTrpA1 (attP2)
	1-S2F	71G01-AD;BDP	w+;UAS-dTrpA1/R71G01-AD (attP40);pBPZpGAL4DBDU (attP2)/+
		BDP;22G11-DBD	w+;UAS-dTrpA1/pBPp65ADZpU (attP40);R22G11-DBD (attP2)/+
		71G01-AD;nsyb-DBD	w+;UAS-dTrpA1/R71G01-AD (attP40);R57C10-DBD (attP2)/+
		nysb-AD;22G11-DBD	w+;UAS-dTrpA1/R57C10-AD (attP40);R22G11-DBD (attP2)/+
		71G01-AD;22G11-DBD	w+;UAS-dTrpA1/R71G01-AD (attP40);R22G11-DBD (attP2)/+
	Figure 1-figure supplement 3
	1-S3B-D	dsxGAL4/R71G01-LexA	w+;UAS>stop>myc::dTrpA1/R71G01-lexA (attP40);dsxGAL4∆2/8XLexAop2-FLPL (attP2)
		dsxGAL4/+	w+;UAS>stop>myc::dTrpA1/+;dsxGAL4∆2/8XLexAop2-FLPL (attP2)
	Figure 3-figure supplement 1		w1118;R15A01-AD(attP40)/20XUAS-IVS-syn21-OpGCaMP6s-p10 (su(Hw)attP5);R71G01-DBD(attP2)/10XUAS-IVS-Syn21-Chrimson::tdT-3.1 (su(Hw)attP1)
	Figure 3-figure supplement 2		see Figure 3A-G
	Figure 3-figure supplement 3		see Figure 3H
	Figure 4-figure supplement 1
		P1a>ReaChR	see Figure 4
	Figure 5-figure supplement 1
		P1a>ReaChR	w1118;pJRFC2-10XUAS-IVS-ReaChR::Citrine (attP40)/R15A01-AD (attP40);R71G01-DBD (attP2)/+
		BDPG4U>ReaChR	w1118;pJRFC2-10XUAS-IVS-ReaChR::Citrine (attP40)/+;pBDPGAL4Uw (attP2)/+
		WT	Canton S
