# Supplementary material for: P1 interneurons promote a persistent internal state that enhances inter-male aggression in Drosophila
Source: eLife. 2015 Dec 29;4:e11346. doi: 10.7554/eLife.11346 (PMC4749567; doi:10.7554/eLife.11346)
Supplement: Supplementary file 1. — DOI: http://dx.doi.org/10.7554/eLife.11346.022 [file elife-11346-supp1.xlsx]

## Sheet: Sheet 1 - Supplemental File 1 -
Supplemental File 1 - Genetic intersections used to target P1 neurons
Driver line	P1 neurons/hemibrain median (range)	n brains	Lunging	Wing extension
R15A01-GAL4	8 (7-10)	5	YES	YES
R22G11-GAL4	20 (19-23)	4	YES	YES
R71G01-GAL4	21 (19-23)	4	YES	YES
R15A01-AD;R71G01-DBD (P1a spGAL4)	9 (8-10)	5	YES	YES
R15A01-AD;R22G11-DBD	8 (8-10)	2	YES	YES
R71G01-AD;R22G11-DBD	11 (10-13)	2	YES	YES
R15A01-GAL4 ∩ fruFLP	2 (1-4)	16	YES	NO
R71G01-GAL4 ∩ fruFLP	5 (3-7)	16	YES	NO
