# Supplementary material for: P1 interneurons promote a persistent internal state that enhances inter-male aggression in Drosophila
Source: eLife. 2015 Dec 29;4:e11346. doi: 10.7554/eLife.11346 (PMC4749567; doi:10.7554/eLife.11346)
Supplement: Supplementary file 3. — (A) The videos and genotypes of flies used to train the lunging and wing extension classifiers. The total number of bouts of each behavior, along with the total number of frames scored as positive or negative for the behavior are shown. (B) Performance of the classifiers against an independent set of 'ground-truth' videos. The framewise error rates and performance of the classifiers was calculated from a set of between 4,000 and 32,000 frames of manually scored ground-truth labels (total frames and total bouts). Frames were labeled as 'Important' if there was no uncertainty about the behavioral label to distinguish them from frames where the human scorer was unsure of the label. For each classifier the error rates, precision and recall for ‘important’ vs. all frames is shown. See Materials and methods for detailed description of ground-truth validation. DOI: http://dx.doi.org/10.7554/eLife.11346.024 [file elife-11346-supp3.xlsx]

## Sheet: TableA
Table A - Traning data sets for JAABA classifiers
Behavior	Bouts of behavior	Frames labeled			Videos used
	labeled	Total	Positive	Negative
Wing extension	450	17601	12409	5192	4 P1a>ReaChR male pairs
Lunge	1629	6514	1990	4524	1 P1a>ReaChR male pair, 1 P1a>TrpA1 male pair, 1 GAL4 hit>TrpA1 male pair

## Sheet: TableB
Table B - Performance of JAABA classifiers
Classifier	Framewise performance							Total frames labeled	Total bouts	Ground-truth data
	Label type	true	true	false	false
		positive	negative	positive	negative	precision	recall			Videos used	Genotype of pairs
		rate	rate	rate	rate					Male-male	male-female
Wing extension	Important	98.8% (12757)	98.8% (15861)	1.2% (254)	1.2% (195)	0.980478	0.984944	29067	1049	7	P1a>ReaChR males
performace with male-male pairs	All	93.6% (14263)	98.5% (16514)	6.4% (977)	1.5% (247)	0.935892	0.982977	32001			P1a>TrpA1 males
Wing extension	Important	90.1% (6617)	98.0% (909)	9.9% (725)	2.0% (19)	0.901253	0.997137	8270	311	3	WT males
performance with male-female pairs	All	79.5% (7859)	97.6% (1249)	20.5% (2027)	2.4% (31)	0.794963	0.996071	11166
Lunge	Important	93.2% (315)	96.3% (3743)	6.8% (23)	3.7% (144)	0.931953	0.686275	4224	899	3	P1a>ReaChR males
performance with male-male pairs	All	87.5% (365)	96.1 (3788)	12.5% (52)	3.9% (155)	0.8753	0.701923	4360			P1a>TrpA1 males
