# Supplementary figures and images for: P1 interneurons promote a persistent internal state that enhances inter-male aggression in Drosophila
Source: eLife journal article supplement (doi:10.7554/elife.11346), 2015-12-29

Figure 1—figure supplement 1

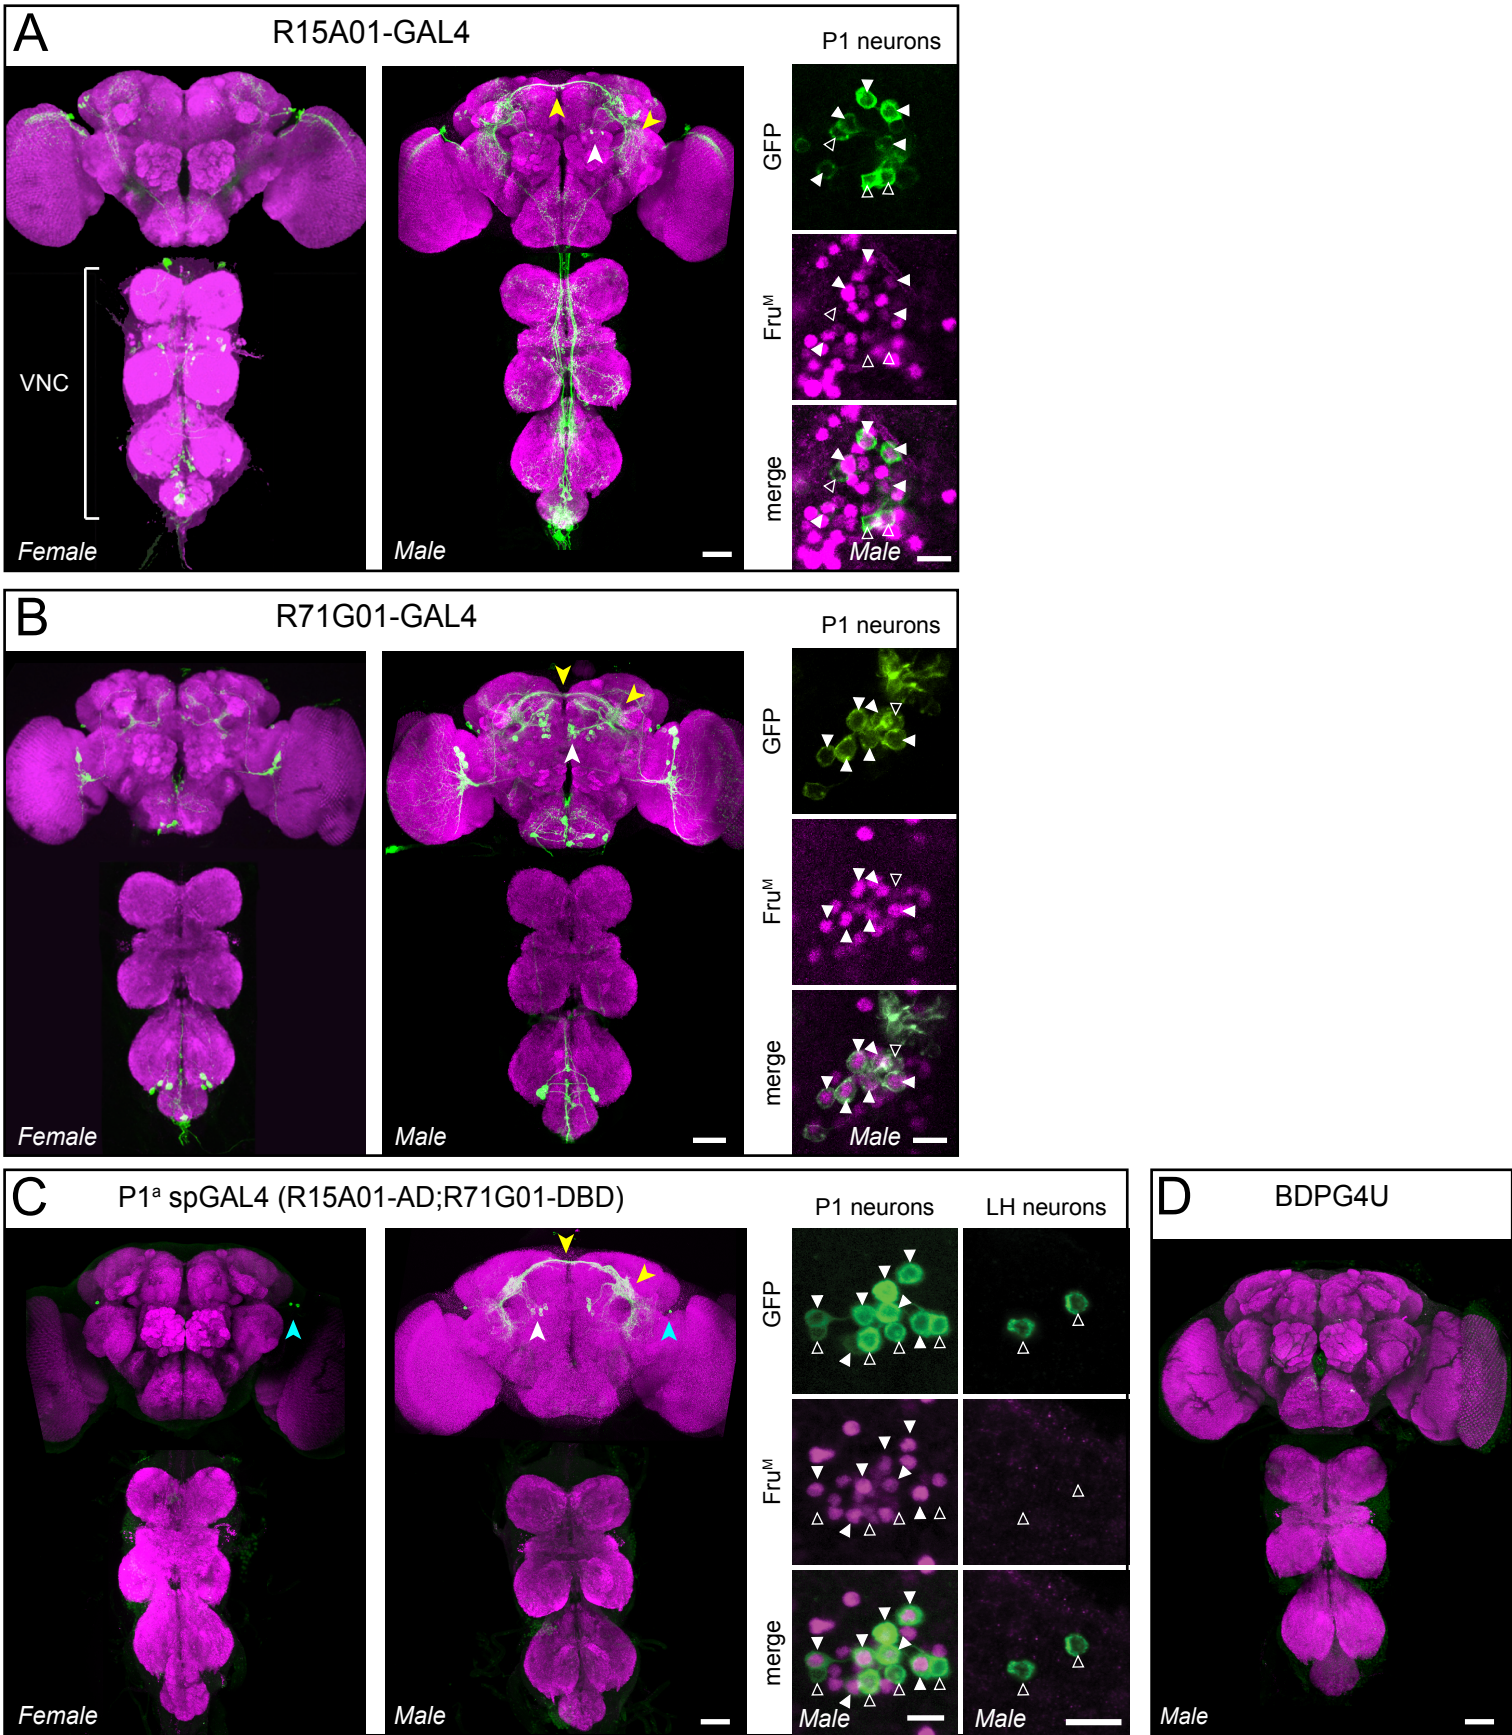

Supplement: supp [file elife-11346-supp-v1.zip]

# Figure 3—figure supplement 3

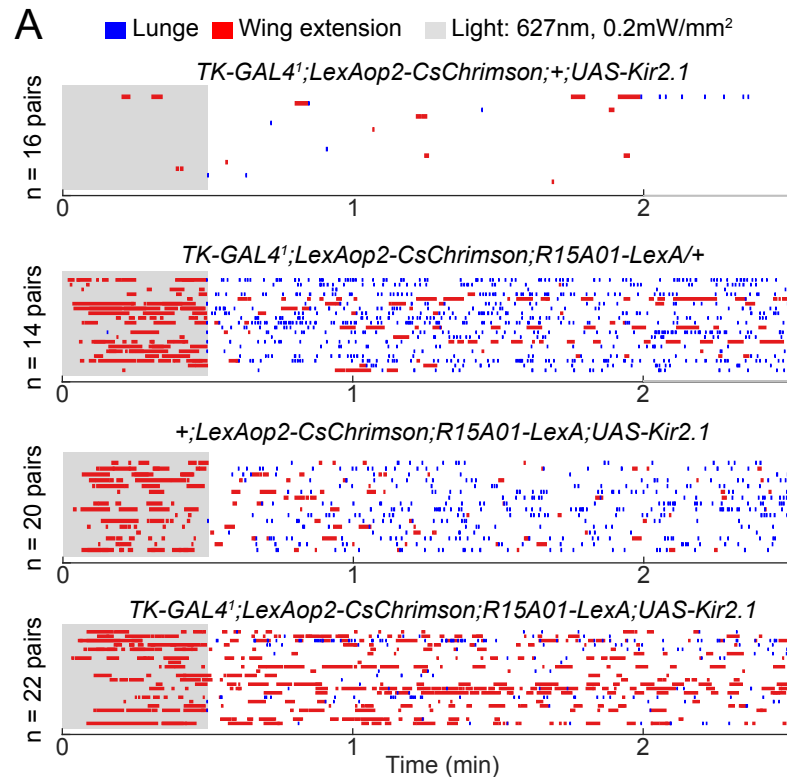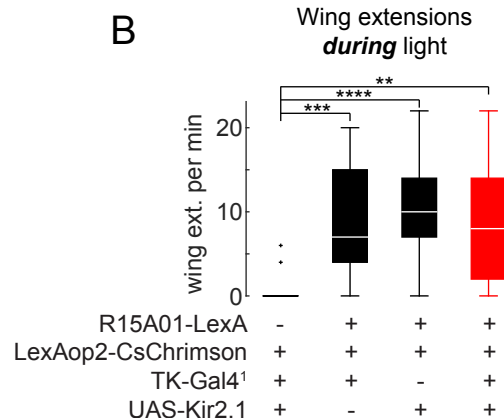

Supplement: supp [file elife-11346-supp-v1.zip]

Figure 5—figure supplement 1

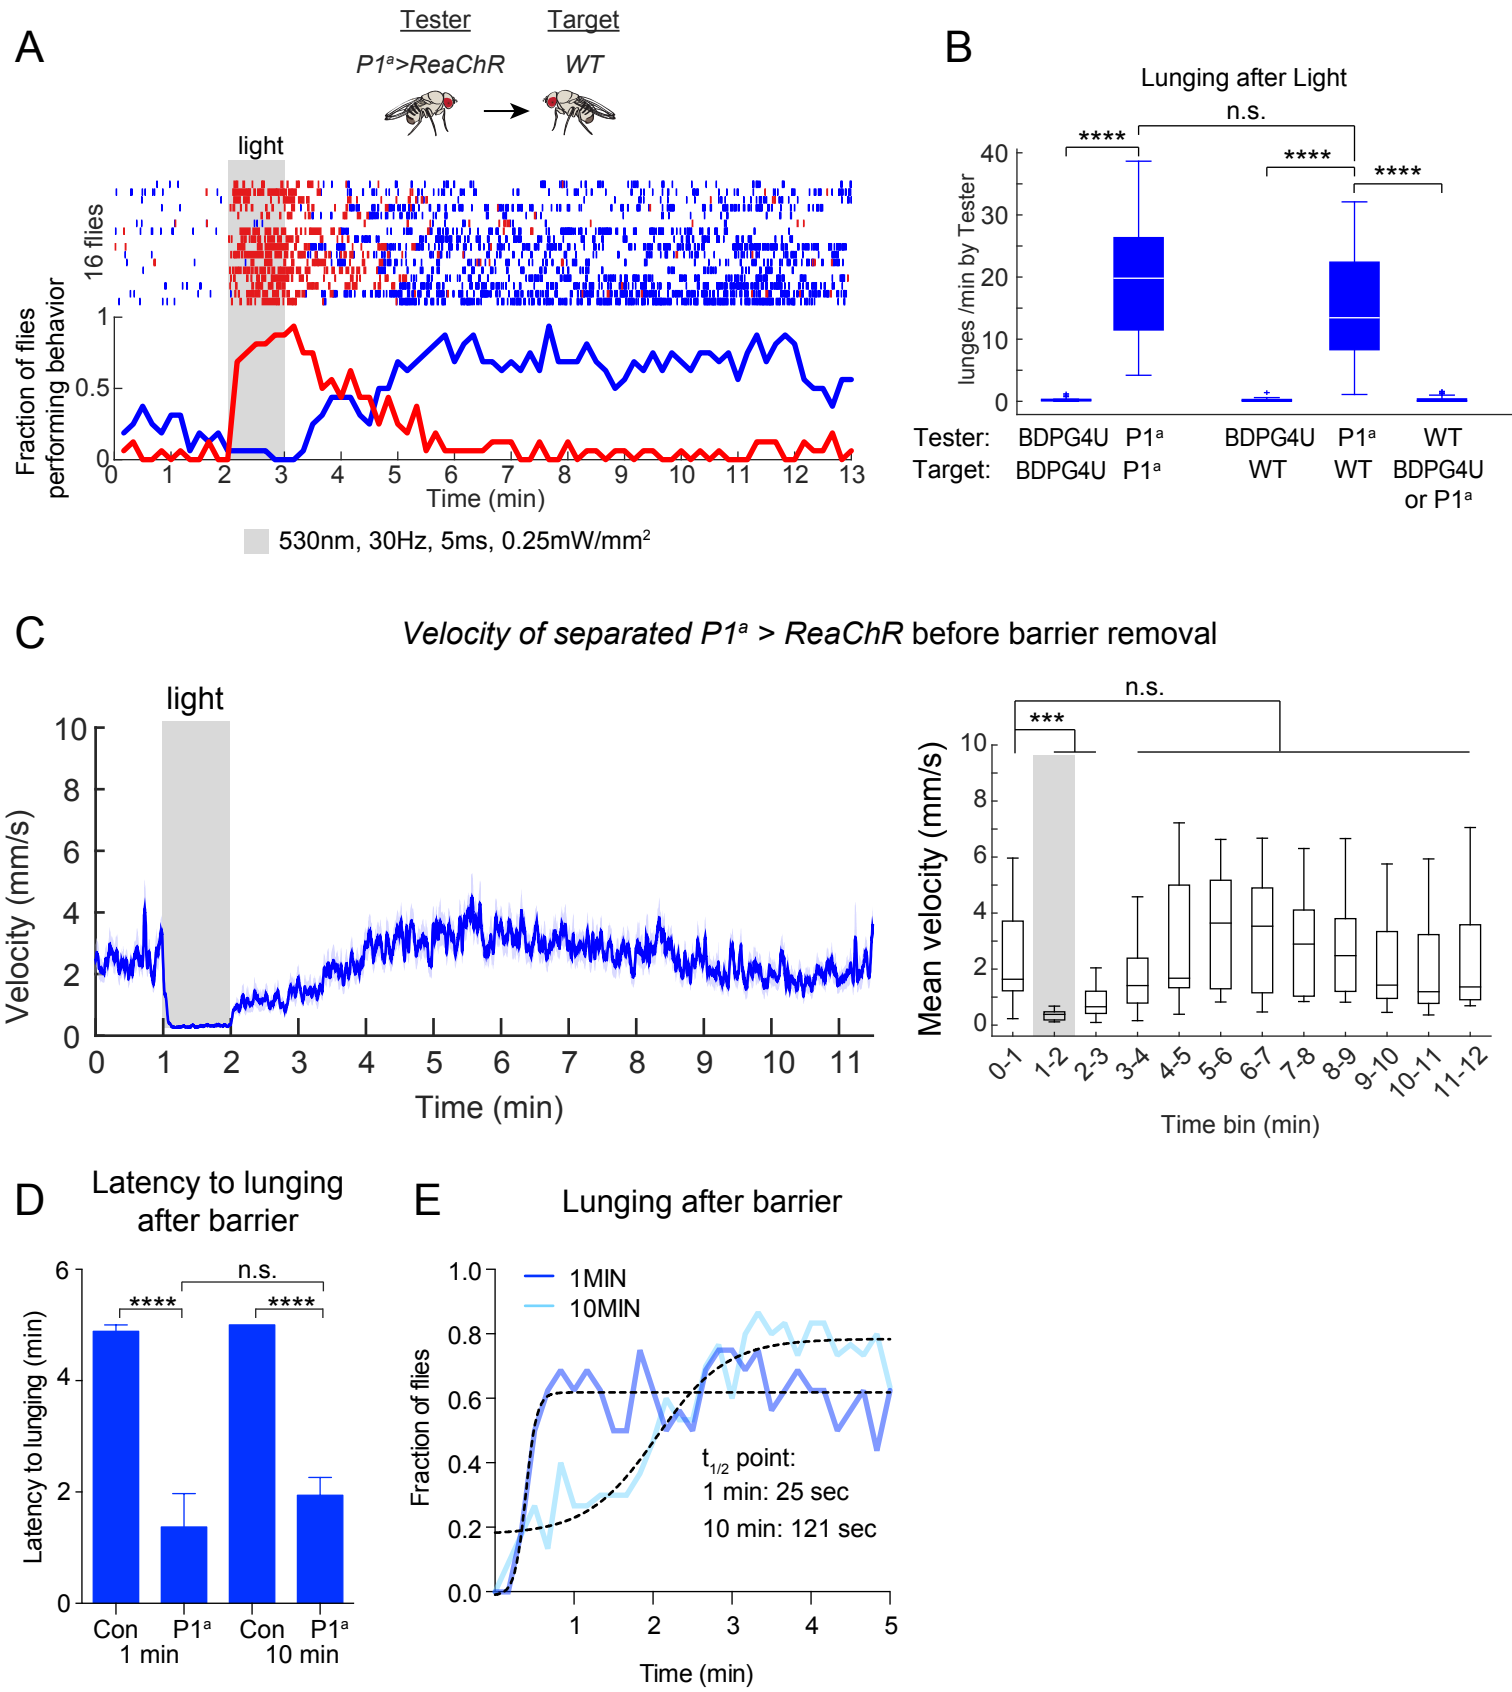

Supplement: supp [file elife-11346-supp-v1.zip]

# Figure 4—figure supplement 1

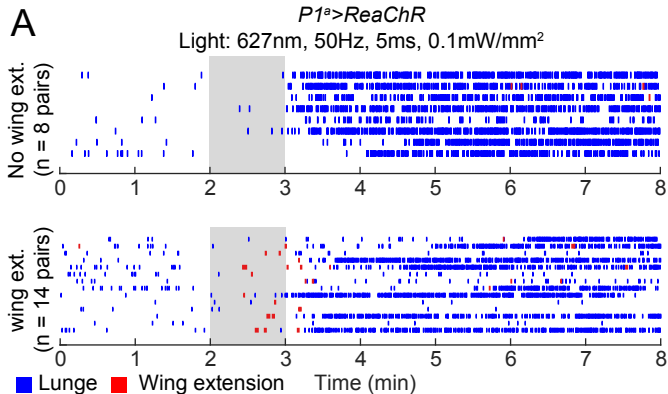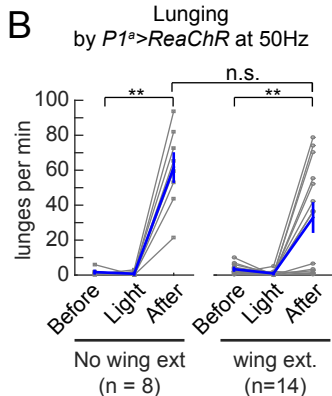

Supplement: supp [file elife-11346-supp-v1.zip]

# Figure 3—figure supplement 1

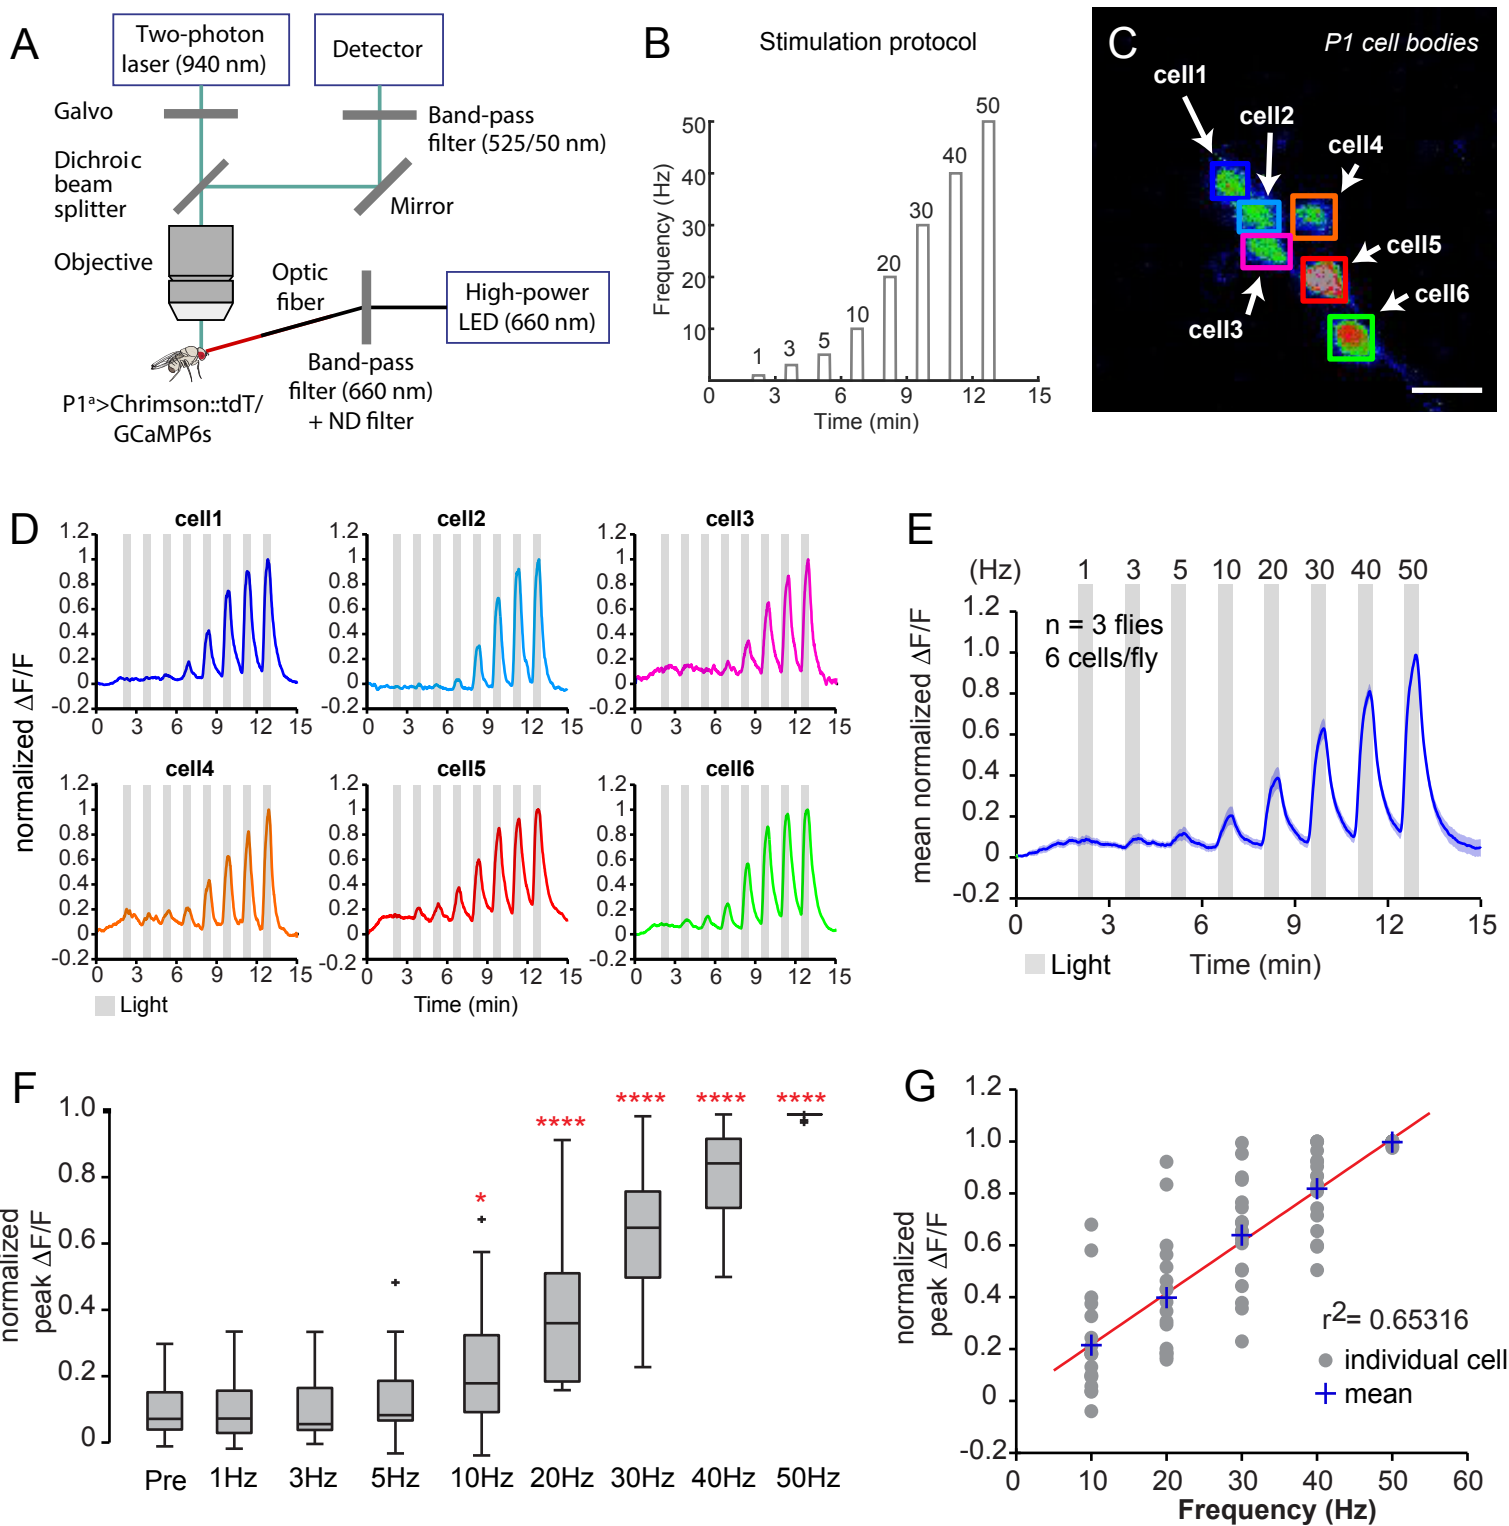

Supplement: supp [file elife-11346-supp-v1.zip]

# Figure 1—figure supplement 3

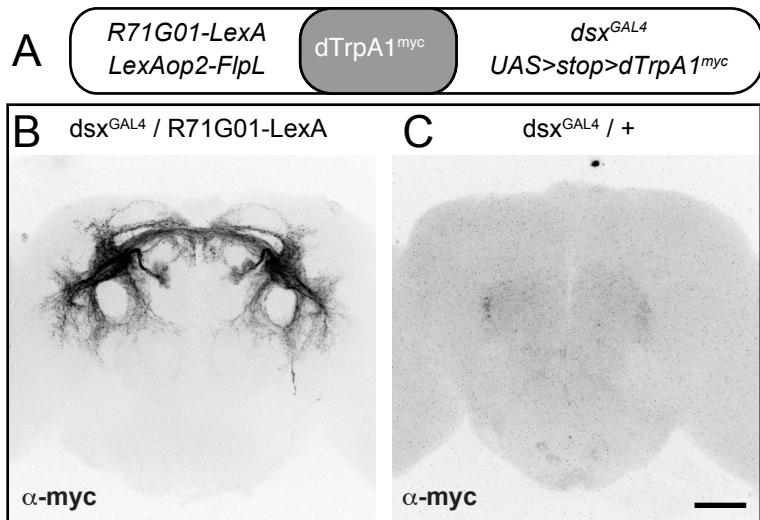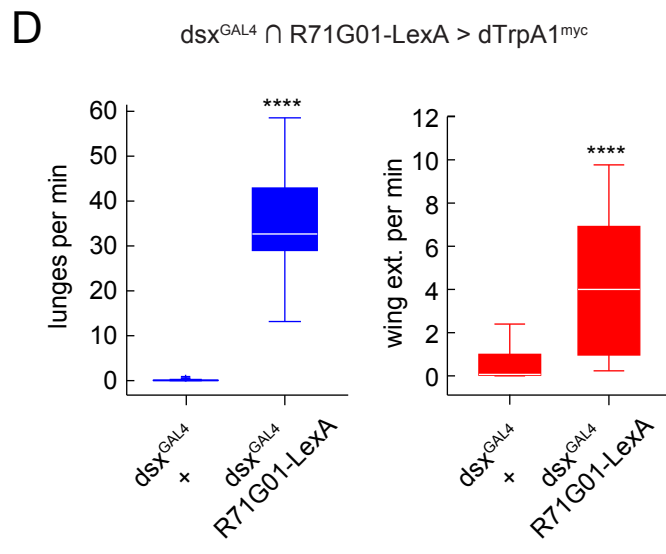

Supplement: supp [file elife-11346-supp-v1.zip]

# Figure 1—figure supplement 2

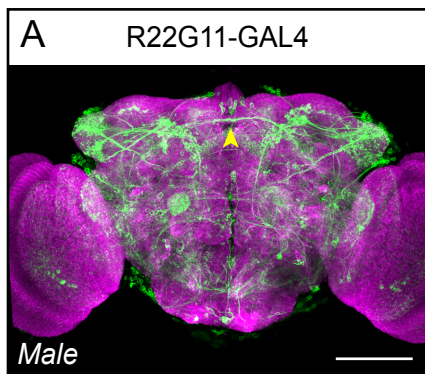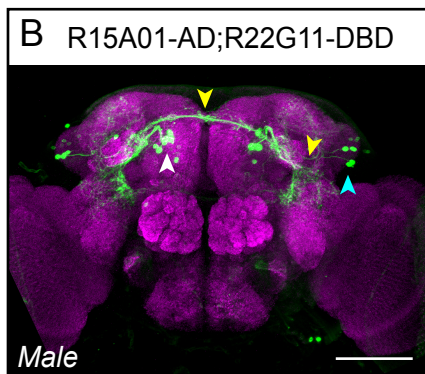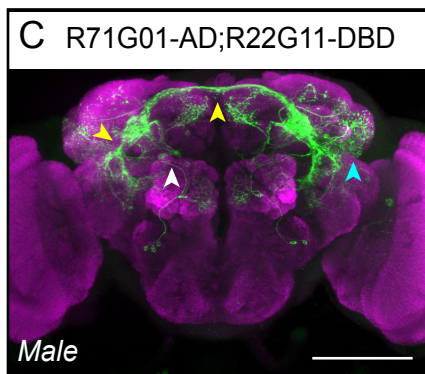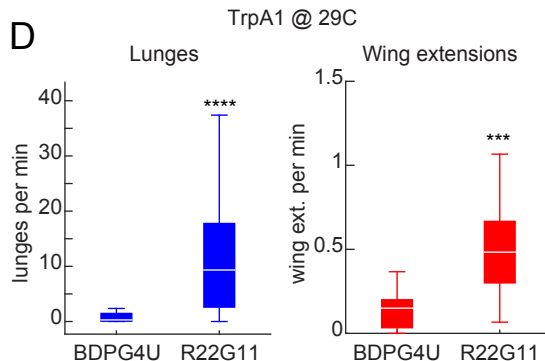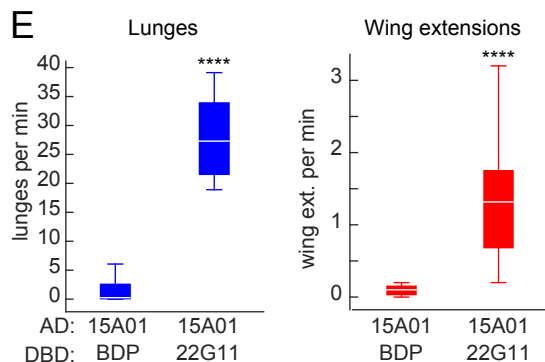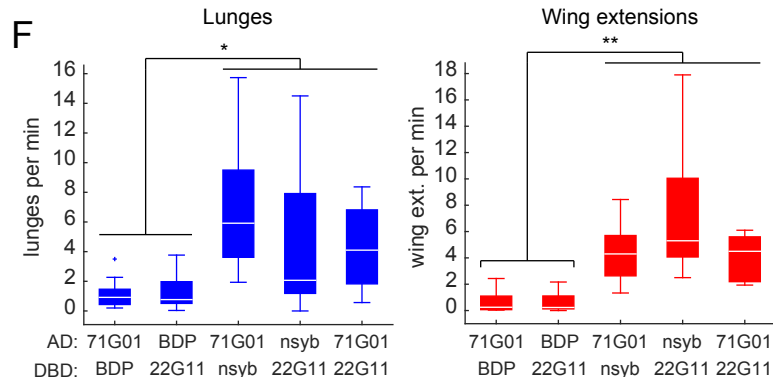

Supplement: supp [file elife-11346-supp-v1.zip]
